# Supplementary material for: Comparison of adverse events following the second/third dose of BNT162b2 in a medical institute in Japan
Source: PubMed Central journal article supplement — Heliyon. 2024 Jul 9;10(14):e34347. doi: 10.1016/j.heliyon.2024.e34347 (PMC11301373; doi:10.1016/j.heliyon.2024.e34347), 2024-07-09
Supplement: mmc2.pdf [file mmc2.pdf]

## Questionnaire

### Coronavirus-2019 (COVID-19)vaccine post-vaccination adverse reaction/events survey

---

1. Survey participation (if you do not agree, choose 'Do not agree' and then, click 'Next'.)

Agree

Do not agree

2. Have you ever received COVID-19 vaccine?

Never

Only once

Twice

Three times

3. On which side of your shoulder did you receive vaccine on? (If you haven't been vaccinated, no answer is required).

4. How old are you?

5. What is your sexual identity?

Female

Male

Others

6. What is your occupation?

Medical student

Nursery student

Pharmacist student

University lecturer (Medical doctor)

University lecturer (Dentist)

University lecturer (Those with medical license, not specified above)

University lecturer (Not specified above)

University staff

Nursery school lecturer

Nursery school staff

Pharmacy University (Lecturer)  
Hospital Resident  
Nurse  
Clinical laboratory technician  
Physiotherapist  
Other staffs of hospital  
Others

7. Have you ever had an allergic reaction following vaccines?

Yes  
No

8. Do you have allergy to food, chemicals or cosmetics?

None.  
Yes.

9. Do you regularly take a medicine?

None.  
Yes.

10. There are reports of association between blood types (ABO) and adverse events. What is your blood type?

A  
B  
O  
AB  
Unknown

11. Are you one of those who have a particular background such as those who need special caution to vaccination ? (You can choose several answers)

Not  
Anticoagulation therapy  
Cardiac disease  
Kidney disease or functional problem  
Hematological disorder  
History of seizure

Abnormal liver function  
Developmental problem  
Pregnant  
Lactating  
Others

12. Have you ever developed COVID-19 or have been diagnosed with SARS-CoV-2 infection?

Never  
Yes

13. This question is for someone who has ever developed COVID-19 or infected with SARS-CoV-2. When did the symptom start or became infected ? (you can choose multiple answers)

Prior to the first vaccine  
Between the first and second vaccines  
Between the second and third vaccines  
After the third vaccines  
Never vaccinated

14. If there is a past medical history (major diseases you got in the past) or a lifestyle-associated disorder such as metabolic syndrome, describe below.

15. Smoking habit

Never  
In the past but not currently smoking  
Currently smoking

16. This question is for someone who has never been vaccinated. Describe the reason why you have not been vaccinated.

17. This question is for someone who has been vaccinated once but not twice. Describe the reason why you have not received second dose.

18. This question is for someone who has been vaccinated twice but not third times. Describe the reason why you have not received third dose.

19. Did you take antipyretics prior to vaccination?

Yes

No

20. Did you take antipyretics after your vaccination?

Took after an adverse event

Took it before the adverse event or even if there was no adverse event

Did not take

21. Have you ever experienced at least one adverse reaction after COVID-19 vaccination?

Never → Finish the survey

Yes

22. Please select from the following the adverse reactions/adverse events you experienced with the COVID-19 vaccine. (multiple choice is allowed)

Anaphylactic reaction

Local reactions/events

pain

swelling

redness

itching

others

Systemic reactions/events

fever

fatigue

nausea/vomiting

headache

chills

sore throat

muscle pain other than at the vaccination site

joint pain

diarrhea

abdominal pain  
skin rash outside the vaccination site  
decreased or abnormal sensation around the mouth  
lymphadenopathy  
hot flashes (flushing)  
others

23. What was the severity of your adverse reaction/event after the third vaccination compared to the first and second?

More severe

Milder

No change

---

Note, Questions 3, 19, 20, 22, and 23 were asked for each vaccination dose.
